# Supplementary material for: Visual duration bisection in profoundly deaf individuals
Source: PeerJ journal article supplement (doi:10.7717/peerj.10133), 2020-10-20
Supplement: Long_response.zip [file Long response_Code.xlsx]

## Sheet: Sheet1
Position	1=center		Duration	1=200		Response	1=long
	2=left			2=300			0=short
	3=right			3=400
				4=500
				5=600
				6=700
				7=800
