# Supplementary material for: Visual duration bisection in profoundly deaf individuals
Source: PeerJ. 2020 Oct 20;8:e10133. doi: 10.7717/peerj.10133 (PMC7583607; doi:10.7717/peerj.10133)
Supplement: Supplemental Information 2 — The data in a row indicates the basic information including sex, age, and group for each participant. [file peerj-08-10133-s002.xlsx]

## Sheet: Sheet1
subject	sex	age	group
1	female	19	hearing
2	female	20	hearing
3	female	20	hearing
4	female	20	hearing
5	male	19	hearing
6	female	19	hearing
7	female	20	hearing
8	female	20	hearing
9	female	18	hearing
10	male	21	hearing
11	male	21	hearing
12	female	20	hearing
13	female	20	hearing
14	female	18	hearing
15	female	19	hearing
16	female	19	hearing
17	male	19	deaf
18	female	20	deaf
19	male	20	deaf
20	male	20	deaf
21	male	18	deaf
22	male	21	deaf
23	male	21	deaf
24	male	21	deaf
25	male	21	deaf
26	female	21	deaf
27	male	19	deaf
28	male	21	deaf
29	female	21	deaf
30	male	21	deaf
31	male	20	deaf
32	male	19	deaf
